# Supplementary material
Source: PubMed Central journal article supplement (PMC2825383)
Supplement: NIHMS168371-supplement-supplementary_fig_1-2.pdf [file NIHMS168371-supplement-supplementary_fig_1-2.pdf]

**Supplementary Figure 1.** Homology analysis of TRAV13 family members of 129 and B6 strains. Coding sequences of TRAV13 family members were aligned and compared against each other. Percentages of homology between each family member are indicated. Sequences with homology of 96% and above are color-coded similarly.

**Supplementary Figure 2.** Identical nucleotide sequences of RSSs of D $\delta$ , J $\delta$ , J $\alpha$ 48 and J $\alpha$ 56 gene segments of B6 and 129 strains.

| Strain |    | C57BL/6 |     |     |     |     |     |     |     |     |     |     |     |     | 129 |     |     |     |     |     |     |     |     |    |
|--------|----|---------|-----|-----|-----|-----|-----|-----|-----|-----|-----|-----|-----|-----|-----|-----|-----|-----|-----|-----|-----|-----|-----|----|
|        |    | DD1     | DD2 | DD3 | DD4 | D1  | D2  | D3  | D4  | 1   | 2   | 3   | 4   | 5   | D1  | D2  | D3  | D4  | 1   | 2   | 3   | 4   | 5   |    |
|        |    | C57BL/6 | DD1 | 100 | 91  | 90  | 91  | 99  | 91  | 90  | 92  | 96  | 91  | 91  | 92  | 86  | 96  | 91  | 91  | 92  | 97  | 91  | 91  | 92 |
| DD2    | 91 |         | 100 | 88  | 96  | 90  | 100 | 88  | 91  | 92  | 96  | 88  | 97  | 87  | 92  | 96  | 88  | 91  | 91  | 98  | 89  | 97  | 87  |    |
| DD3    | 90 |         | 88  | 100 | 87  | 90  | 88  | 99  | 88  | 90  | 87  | 99  | 88  | 82  | 90  | 87  | 98  | 88  | 91  | 87  | 98  | 88  | 81  |    |
| DD4    | 91 |         | 96  | 87  | 100 | 90  | 96  | 87  | 91  | 91  | 97  | 87  | 97  | 87  | 92  | 97  | 88  | 91  | 91  | 96  | 88  | 98  | 87  |    |
| D1     | 99 |         | 90  | 90  | 90  | 100 | 90  | 90  | 92  | 96  | 91  | 90  | 91  | 84  | 96  | 90  | 91  | 92  | 96  | 90  | 91  | 91  | 85  |    |
| D2     | 91 |         | 100 | 88  | 96  | 90  | 100 | 88  | 91  | 92  | 96  | 88  | 97  | 87  | 92  | 96  | 88  | 91  | 91  | 99  | 89  | 97  | 87  |    |
| D3     | 90 |         | 88  | 99  | 87  | 90  | 88  | 100 | 88  | 90  | 88  | 99  | 88  | 82  | 90  | 87  | 98  | 88  | 91  | 87  | 98  | 88  | 81  |    |
| D4     | 92 |         | 91  | 88  | 91  | 92  | 91  | 88  | 100 | 92  | 91  | 88  | 92  | 87  | 92  | 91  | 89  | 99  | 92  | 91  | 89  | 93  | 87  |    |
| 1      | 96 |         | 92  | 90  | 91  | 96  | 92  | 90  | 92  | 100 | 92  | 91  | 91  | 86  | 99  | 91  | 91  | 92  | 97  | 91  | 91  | 91  | 85  |    |
| 2      | 91 |         | 96  | 87  | 97  | 91  | 96  | 88  | 91  | 92  | 100 | 88  | 96  | 87  | 92  | 99  | 88  | 91  | 91  | 96  | 88  | 97  | 87  |    |
| 3      | 91 |         | 88  | 99  | 87  | 90  | 88  | 99  | 88  | 91  | 88  | 100 | 88  | 82  | 90  | 87  | 98  | 88  | 91  | 87  | 98  | 88  | 81  |    |
| 4      | 92 |         | 97  | 88  | 97  | 91  | 97  | 88  | 92  | 91  | 96  | 88  | 100 | 86  | 92  | 96  | 89  | 92  | 91  | 96  | 89  | 98  | 86  |    |
| 5      | 86 |         | 87  | 82  | 87  | 84  | 87  | 82  | 87  | 86  | 87  | 82  | 86  | 100 | 85  | 87  | 83  | 87  | 85  | 87  | 83  | 88  | 99  |    |
| 129    | D1 |         | 96  | 92  | 90  | 92  | 96  | 92  | 90  | 92  | 99  | 92  | 90  | 92  | 85  | 100 | 92  | 90  | 92  | 97  | 91  | 91  | 92  | 84 |
|        | D2 | 91      | 96  | 87  | 97  | 90  | 96  | 87  | 91  | 91  | 99  | 87  | 96  | 87  | 92  | 100 | 88  | 97  | 90  | 96  | 88  | 96  | 87  |    |
|        | D3 | 91      | 88  | 98  | 88  | 91  | 88  | 98  | 89  | 91  | 88  | 98  | 89  | 83  | 90  | 88  | 100 | 89  | 91  | 88  | 98  | 89  | 82  |    |
|        | D4 | 92      | 91  | 88  | 91  | 94  | 91  | 88  | 99  | 92  | 91  | 88  | 92  | 87  | 92  | 97  | 89  | 100 | 92  | 91  | 89  | 93  | 87  |    |
|        | 1  | 97      | 91  | 91  | 91  | 96  | 91  | 91  | 92  | 97  | 91  | 91  | 91  | 85  | 97  | 90  | 91  | 92  | 100 | 90  | 92  | 91  | 85  |    |
|        | 2  | 91      | 98  | 87  | 96  | 90  | 99  | 87  | 91  | 91  | 96  | 87  | 96  | 87  | 91  | 96  | 88  | 91  | 90  | 100 | 88  | 96  | 87  |    |
|        | 3  | 91      | 89  | 98  | 88  | 91  | 89  | 98  | 89  | 91  | 88  | 98  | 89  | 83  | 91  | 88  | 98  | 89  | 92  | 88  | 100 | 89  | 82  |    |
|        | 4  | 92      | 97  | 88  | 98  | 91  | 97  | 88  | 93  | 91  | 97  | 88  | 98  | 88  | 92  | 96  | 89  | 93  | 91  | 96  | 89  | 100 | 87  |    |
|        | 5  | 85      | 87  | 81  | 87  | 85  | 87  | 81  | 87  | 85  | 87  | 81  | 86  | 99  | 84  | 87  | 82  | 87  | 85  | 87  | 82  | 87  | 100 |    |

**RSS****Nucleotide Sequences**

|                |                                           |
|----------------|-------------------------------------------|
| 5'D $\delta$ 1 | TGTTTTTGT ACGGCTGTGTTT CACTGTG            |
| 5'D $\delta$ 2 | GGTTTTTGC AAAGCTCTGTAG CACCGTG            |
| 3'D $\delta$ 1 | CACACAG GTTGAAGTATATTAAACCTCTGT TCAGAAACA |
| 3'D $\delta$ 2 | CACAGTG TTGCAAACCCCATAGGGACCTGT ACAAAAAC  |
| J $\delta$ 1   | GGTTTTTGG AATGGCCTCAGT AGCTGTG            |
| J $\delta$ 2   | GGTTATCTG CAAAGCAAGATT ATAACGT            |
| J $\alpha$ 48  | GGATTTTGT AATGGCTTGGCA CACTGTG            |
| J $\alpha$ 56  | AGTTTTTGT AGAGTCCCGTGT CATTGTG            |
